# Supplementary material for: Surface cysteine to serine substitutions in IL-18 reduce aggregation and enhance activity
Source: PeerJ. 2022 Jul 5;10:e13626. doi: 10.7717/peerj.13626 (PMC9266699; doi:10.7717/peerj.13626)
Supplement: Supplemental Information 1 [file peerj-10-13626-s001.xlsx]

## Sheet: Sheet1
		WT	DM	DM1234
		0.2156	0.3951	0.2069
		0.4208	0.2691	0.1771
		0.3924	0.2679	0.1879
				0.1905
	MEAN	0.342933	0.3107	0.1906
	SD	0.111184	0.073095	0.0123185
