# Supplementary material for: Surface cysteine to serine substitutions in IL-18 reduce aggregation and enhance activity
Source: PeerJ. 2022 Jul 5;10:e13626. doi: 10.7717/peerj.13626 (PMC9266699; doi:10.7717/peerj.13626)
Supplement: Supplemental Information 3 [file peerj-10-13626-s003.xlsx]

## Sheet: Sheet1
	STD IFN-g	1000	500	250	125	62.5	31.3	15.6	0
		2.533	1.384	0.736	0.377	0.191	0.102	0.058	0.016
		2.467	1.395	0.742	0.38	0.194	0.104	0.059	0.014
	x-bar	2.368	1.348	0.704	0.369	0.185	0.106	0.046	0.014
			300						150						75
	final conc.		Wt	DM	DM1234	base buffer	IL-12		wt	DM	DM1234				wt	DM	DM1234
		300	8.8	31.15	99.61	8.54	7.74	150	10.56	17.01	49.79			75	10.85	13.74	31.2
			8.94	36.9	99.32	9.71	10.23		7.98	16.21	51.68				10.49	13.06	31.41
			10.23	29.32	76.86	9.64	11.44		9.69	16.83	54.63				9.84	14.56	29.76
		x-bar	9.32333	32.4567	91.93	9.29667	9.80333		9.41	16.6833	52.0333				10.3933	13.7867	30.79
		SD	0.78831	3.95533	13.0518	0.656227	1.88654		1.31259	0.419682	2.43927				0.511892	0.751088	0.898165
	IL-18 conc.	WT		75	150	300	DM	75	150	300	DM1234	75	150	300
	IFN MEAN			5.583	6.42	9.32		9.53	12.4	32.46		13.7	27.05	91.93
	IFN SD			0.7	0.42	0.79		0.66	2.63	3.96		1.75	1.15	13.05
			0.5 ng/ml IL-12
			IFN MEAN	9.8	9.8	9.8
			IFN SD	1.89	1.89	1.89
